# Supplementary material
Source: PubMed Central journal article supplement (PMC2754722)

Supplementary figure 1, Golonzhka et al.

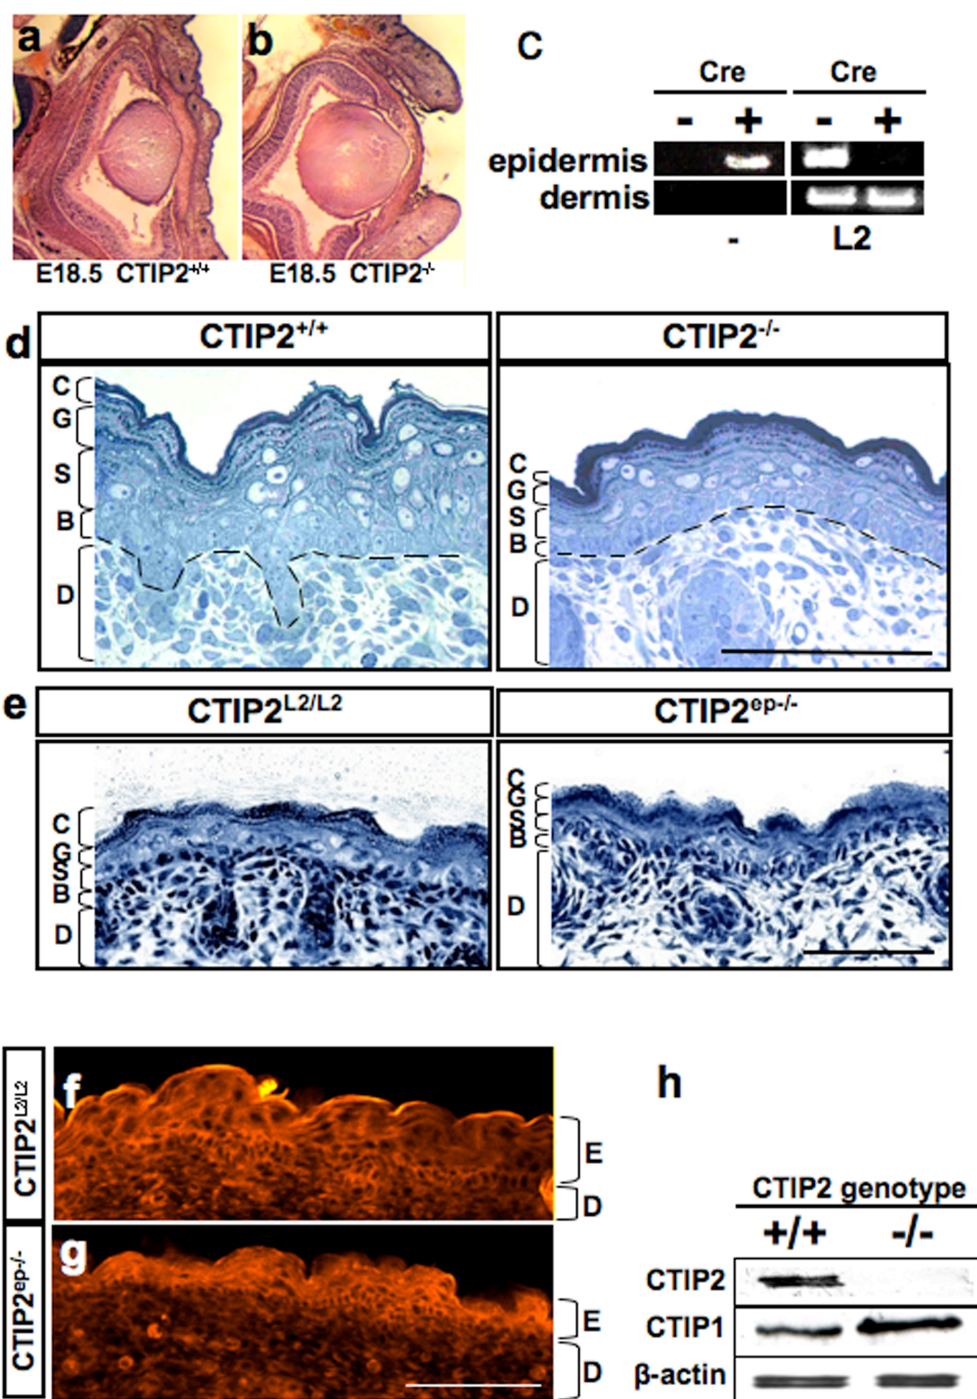

Supplementary figure 2, Golonzhka et al.

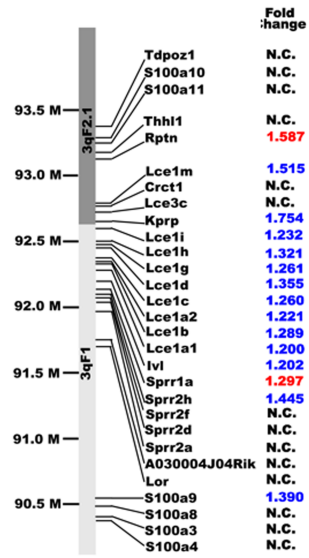

Supplement: NIHMS117891-supplement-Supplemental_Figures.pdf [file NIHMS117891-supplement-Supplemental_Figures.pdf]
